# Supplementary material for: Differential Patterns of Service Use for Depression Among Diverse Medicaid-Insured Children and Youth
Source: Research Square preprint supplement (doi:10.21203/rs.3.rs-7643217/v1), 2025-10-23
Supplement: Supplementary file 1 [file a3f65a450b050aa1d46304d6.docx]

FIGURE S1. Flow Chart of Study Cohorts

| Medicaid-insured, 0-17 years of age, and residing in NYC as of December 31, 2021 |  | Exclusions |
| --- | --- | --- |
| 1,130,745 |  |  |
|  |  | No health services in 2021 |
|  |  | 37,207 |
| 1,093,538 |  |  |
|  |  | No continuous Medicaid eligibility (>45 day gap) |
|  |  | 228,239 |
| 865,299 |  |  |
|  |  | Dual Eligible for Medicare |
|  |  | 18 |
| **Study Population** |  |  |
| **865,281** |  |  |
|  |  |  |
| Depression diagnosis in 2021 |  |  |
| 17,613 (2.04%) |  |  |
|  |  | Co-occurring schizophrenia spectrum, or bipolar disorder |
|  |  | 783 |
| Depression diagnosis - Prevalent Cases |  |  |
| 16,830 (1.95%) |  |  |
|  |  | Prior depression diagnosis (12 months prior to index) |
|  |  | 5,737 |
| **Depression diagnosis- Incident Cases  (New Episode in 2021)** |  |  |
| **11,093 (1.28%)** |  |  |

*Notes:* **Any Treatment**= Any Outpatient Service or Antidepressant. **Any OP** = any outpatient clinical service with a primary depression diagnosis. **Any AD** = any filled prescription for an antidepressant medication. **4+OP** = adequate outpatient treatment measure with 4+ outpatient services among those with 1 or more follow-up visit. **AOR**= adjusted odds ratios (adjusted for sex, age) with 95% confidence intervals

* Indicates significant difference in adjusted odds compared to the White Non-Hispanic reference group.
